# Supplementary material for: Pollution Risk Assessment of Heavy Metals along Kitchener Drain Sediment, Nile Delta
Source: MDPI journal article supplement (doi:10.3390/soilsystems7040085), 2023-10-14
Supplement: s1 [file s1]

## Article

# Pollution Risk Assessment of Heavy Metals along Kitchener Drain Sediment, Nile Delta

Yasser A. El-Amier <sup>1</sup>, Giuliano Bonanomi <sup>2</sup> and Ahmed M. Abd-ElGawad <sup>3,\*</sup>

<sup>1</sup> Department of Botany, Faculty of Science, Mansoura University, Mansoura 35516, Egypt; [yasran@mans.edu.eg](mailto:yasran@mans.edu.eg)

<sup>2</sup> Department of Agriculture, University of Naples Federico II, Portici, 80055 Naples, Italy; [giuliano.bonanomi@unina.it](mailto:giuliano.bonanomi@unina.it)

<sup>3</sup> Plant Production Department, College of Food & Agriculture Sciences, King Saud University, P.O. Box 2460 Riyadh 11451, Saudi Arabia; [aibrahim2@ksu.edu.sa](mailto:aibrahim2@ksu.edu.sa)

\* Correspondence: [aibrahim2@ksu.edu.sa](mailto:aibrahim2@ksu.edu.sa); Tel.: 00966562680864

## Supplementary material

**Citation:** To be added by editorial staff during production.

Academic Editor: Firstname Last-name

Received: date

Revised: date

Accepted: date

Published: date

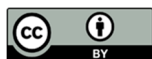

**Copyright:** © 2023 by the authors. Submitted for possible open access publication under the terms and conditions of the Creative Commons Attribution (CC BY) license (<https://creativecommons.org/licenses/by/4.0/>).

**Table S1.** Pollution quantification (single and total complex indices) used in this study.

| Ecological indicators                                    | Formula                                                        | Value        | Environmental risk grade                       | References                               |
|----------------------------------------------------------|----------------------------------------------------------------|--------------|------------------------------------------------|------------------------------------------|
| Single indices of pollution:                             |                                                                |              |                                                |                                          |
| Potential Contami-<br>nation Index (PCI)                 | $PCI_i = \frac{C_x \max}{C_{\text{bkg}}}$                      | PCI < 1      | Unpolluted, low level of pollution             | Davaulter and                            |
|                                                          |                                                                | 1 ≤ PCI ≤ 3  | Moderate polluted                              | Rognerud, 2001)                          |
|                                                          |                                                                | PCI ≥ 3      | Strong polluted                                | Wu et al. (2015)                         |
| Geoaccumulation<br>Index ( <i>Igeo</i> )                 | $Igeo = \text{Log2} \left( \frac{C_x}{1.5Bn} \right)$          | Igeo ≤ 0     | Uncontaminated                                 | Muller (1969), `<br>Lu and Bai (2010)    |
|                                                          |                                                                | 0 < Igeo < 1 | Uncontaminated to moderately contami-<br>nated |                                          |
|                                                          |                                                                | 1 < Igeo < 2 | Moderately to heavily contaminated             |                                          |
|                                                          |                                                                | 2 < Igeo < 3 | Moderately to strongly contaminated            |                                          |
|                                                          |                                                                | 3 < Igeo < 4 | Strongly contaminated                          |                                          |
|                                                          |                                                                | 4 < Igeo < 5 | Strongly to extremely contaminated             |                                          |
|                                                          |                                                                | Igeo > 5     | Extremely high contaminated                    |                                          |
| Total complex indices of pollution (integrated indices): |                                                                |              |                                                |                                          |
| Pollution Load In-<br>dex (PLI)                          | $PLI = (Cf_1 \times Cf_2 \times \dots \times Cf_n)^{1/n}$      | PLI > 1      | Polluted                                       | Tomlinson et al., 1980                   |
|                                                          |                                                                | PLI ≤ 1      | No pollution                                   | Seshan et al., 2010                      |
| Degree of Contami-<br>nation (Dc)                        | $Dc = \sum_{i=1}^n Cf_i$<br>$Cf = C_x / C_{\text{Background}}$ | Dc < 8       | Low DC                                         | Hakanson (1980);<br>Caeiro et al. (2005) |
|                                                          |                                                                | N ≤ Dc < 16  | Moderate DC                                    |                                          |
|                                                          |                                                                | 16 ≤ Dc < 32 | Considerable DC                                |                                          |
|                                                          |                                                                | Dc > 32      | Very high DC                                   |                                          |

C<sub>x</sub>: metal concentration in soil analyzed sample; C<sub>background</sub>: metal concentration in the reference environment; Bn: the geochemical background value in aver-  
age shale of element n; 1.5: the background matrix correction due to terrigenous effects; Cf: the contamination factor.

**Table S2.** Eco-toxicity indices used in the present study.

21

| Eco-toxicity indices                                          | Formula                                                                                                                                                          | Value                    | Environmental risk grade                   | References                                  |
|---------------------------------------------------------------|------------------------------------------------------------------------------------------------------------------------------------------------------------------|--------------------------|--------------------------------------------|---------------------------------------------|
| The mean Probable Effects Level quotient (mPEL <sub>Q</sub> ) | $mPEL_Q = \frac{\sum_{i=1}^n \frac{C_x}{PEL_i}}{n}$                                                                                                              | $mPEL_Q \leq 0.1$        | Low degree of contamination                | Carr et al., 1996                           |
|                                                               |                                                                                                                                                                  | $0.1 < mPEL_Q \leq 1.5$  | Medium-low degree of contamination         |                                             |
|                                                               |                                                                                                                                                                  | $1.51 < mPEL_Q \leq 2.3$ | High-medium degree of contamination        | Long et al., 2006                           |
|                                                               |                                                                                                                                                                  | $mPEL_Q > 2.3$           | High degree of contamination               |                                             |
| The mean Effect Range Median quotient (mERM <sub>Q</sub> )    | $mERM_Q = \frac{\sum_{i=1}^n \frac{C_x}{ERM_i}}{n}$                                                                                                              | $mERM_Q \leq 0.1$        | Low priority site                          | Long et al., 2000                           |
|                                                               |                                                                                                                                                                  | $0.1 < mERM_Q \leq 0.5$  | Medium-low priority site                   |                                             |
|                                                               |                                                                                                                                                                  | $0.5 < mERM_Q \leq 1.5$  | High-medium priority site                  |                                             |
|                                                               |                                                                                                                                                                  | $mERM_Q > 1.5$           | High priority site                         |                                             |
| Contamination Severity Index (CSI)                            | $W_t = \frac{L_{fi} \times E_{\gamma}}{\sum_{i=1}^n (L_{fi} \times E_{\gamma})}$<br>$CSI = \sum_{i=1}^w W_t [(\frac{C_x}{ERL_i})^{1/2} + (\frac{C_x}{ERM_i})^2]$ | $CSI < 0.5$              | Uncontaminated                             | Burton, 2002;<br>MacDonald et al., 2000     |
|                                                               |                                                                                                                                                                  | $0.5 \leq CSI < 1$       | Very low severity of contamination         |                                             |
|                                                               |                                                                                                                                                                  | $1 \leq CSI < 1.5$       | Low severity of contamination              |                                             |
|                                                               |                                                                                                                                                                  | $1.5 \leq CSI < 2$       | Low to moderate severity of contamination  |                                             |
|                                                               |                                                                                                                                                                  | $2 \leq CSI < 2.5$       | Moderate severity of contamination         |                                             |
|                                                               |                                                                                                                                                                  | $2.5 \leq CSI < 3$       | Moderate to high severity of contamination |                                             |
|                                                               |                                                                                                                                                                  | $3 \leq CSI < 4$         | High severity of contamination             |                                             |
|                                                               |                                                                                                                                                                  | $4 \leq CSI < 5$         | High severity of contamination             |                                             |
|                                                               |                                                                                                                                                                  | $CSI \geq 5$             | Very high severity of contamination        |                                             |
|                                                               |                                                                                                                                                                  |                          | Ultra-high severity of contamination       |                                             |
| Hazard Quotients (HQ)                                         | $HQ = \frac{C_x}{SQG}$                                                                                                                                           | $HQ < 0.1$               | No adverse effects                         | Feng et al., 2011<br>MacDonald et al., 2000 |
|                                                               |                                                                                                                                                                  | $0.1 \leq HQ \leq 1$     | Potential hazards                          |                                             |
|                                                               |                                                                                                                                                                  | $1 < HQ \leq 10$         | Moderate hazards                           |                                             |
|                                                               |                                                                                                                                                                  | $HQ > 10$                | High hazards.                              |                                             |
| Modified Hazard Quotient (mHQ)                                | $mHQ = [C_x (\frac{1}{TEL_i} + \frac{1}{PEL_i} + \frac{1}{SEL_i})]^{1/2}$                                                                                        | $mHQ < 0.5$              | Nil to very low severity of contamination  | Benson et al., 2018                         |
|                                                               |                                                                                                                                                                  | $0.5 \leq mHQ < 1.0$     | Very low severity of contamination         |                                             |
|                                                               |                                                                                                                                                                  | $1.0 < mHQ < 1.5$        | Low severity of contamination              |                                             |
|                                                               |                                                                                                                                                                  | $1.5 < mHQ < 2.0$        | Moderate severity of contamination         |                                             |
|                                                               |                                                                                                                                                                  | $2.0 < mHQ < 2.5$        | Considerable severity of contamination     |                                             |
|                                                               |                                                                                                                                                                  | $2.5 < mHQ < 3.0$        | High severity of contamination             |                                             |
|                                                               |                                                                                                                                                                  | $3.0 < mHQ \leq 3.5$     | Very high severity of contamination        |                                             |
|                                                               |                                                                                                                                                                  | $mHQ > 3.5$              | Extreme severity of contamination          |                                             |

C<sub>x</sub>: metal concentration in soil analyzed sample; PEL: probable effect level; ERM: effects range median; L<sub>f</sub>: Loading factor; E<sub>v</sub>: Eigenvalue;

ERL: effects range low; SQG: sediment quality guidelines; TEL: threshold effect level; SEL: severe effect level.

22

23

24

**Table S3.** Threshold, midrange and extreme effects sediment guidelines for selected metals (mg/kg)

| Sediment Quality Guidelines | Pb    | Cd    | Ni    | Cr    | Cu    | Zn    | Co | Reference                  |
|-----------------------------|-------|-------|-------|-------|-------|-------|----|----------------------------|
| ERL                         | 35    | 5     | 30    | 80    | 70    | 120   | -  | Macdonald et al., 2000     |
| % of lower ERL              | 16.67 | 16.67 | 16.67 | 16.67 | 83.33 | 16.67 | -  |                            |
| TEL                         | 35    | 0.6   | 18    | 37.3  | 16    | 120   | -  | Graney and Eriksen 2004    |
| % of lower TEL              | 16.67 | 16.67 | 16.67 | 16.67 | 16.67 | 16.67 | -  |                            |
| ERM                         | 110   | 9     | 50    | 145   | 390   | 270   | -  | Taylor, 1946               |
| % of lower ERM              | 66.67 | 83.33 | 66.67 | 16.67 | 100   | 83.33 | -  |                            |
| PEL                         | 91.3  | 3.53  | 36    | 90    | 197   | 315   | -  | Taylor, 1946               |
| % of lower PEL              | 66.67 | 16.67 | 16.67 | 16.67 | 100   | 83.33 | -  |                            |
| SEL                         | 250   | 10    | 75    | 110   | 110   | 270   | -  | Taylor, 1946               |
| % of lower SEL              | 66.67 | 100   | 100   | 16.67 | 83.33 | 83.33 | -  |                            |
| Shale standard              | 20    | 0.3   | 68    | 90    | 45    | 95    | 19 | Turekin and Wedephol, 1961 |
| GBC % of lower GBC          | 16.67 | 16.67 | 100   | 16.67 | 50    | 16.67 | -  |                            |
| Earth Crust                 | 12.5  | 0.15  | 75    | 100   | 39    | 67    | 17 | Taylor, 1946               |

ERL: effects range low; TEL: threshold effect level; ERM: effects range median; PEL: probable effect level; SEL: severe effect level; GBG = geochemical background.

Table S4. Health risk assessment indices were used in this study.

29

| Human health risk indices           | Formula                                                                                         | Value                                                                                                                                        | Cancer risks levels                                                                            | References                              |
|-------------------------------------|-------------------------------------------------------------------------------------------------|----------------------------------------------------------------------------------------------------------------------------------------------|------------------------------------------------------------------------------------------------|-----------------------------------------|
| Chemical Daily In-take (CDI)        | $CDI = (C \times IngR \times EF \times ED \times CF) / (BW \times AT)$                          |                                                                                                                                              |                                                                                                | USEPA, 2011a<br>Abdelhafez and Li, 2015 |
| Dermal Absorbed Dose (DAD)          | $DAD = (C \times SA \times SL \times ABS/BW) / (EF \times ED)/AT$                               |                                                                                                                                              |                                                                                                |                                         |
| Exposure Concen-tration (EC)        | $EC_{inhalation} = (C \times EF \times ED \times CF_{inh}) / (AT_n)$                            |                                                                                                                                              |                                                                                                |                                         |
| <i>Non-cancer hazard assessment</i> |                                                                                                 |                                                                                                                                              |                                                                                                |                                         |
| Hazard quotient (HQ)                | $HQ = (CDI/RFD_0)$<br>$HQ = DAD/(RFD_0 \times GIABS)$<br>$HQ = (EC/RFC_i \times 1000 \mu g/mg)$ |                                                                                                                                              |                                                                                                | USEPA, 2011a, b & c                     |
| Hazard index (HI)                   | $HI = \sum HQ$                                                                                  | $HI \leq 1$<br>$HI > 1$                                                                                                                      | No significant haz-ard of non-carcino-genic effects<br><br>Chance of non-car-cinogenic effects |                                         |
| <i>Carcinogenic risk</i>            |                                                                                                 | $CR < 10^{-6}$<br>$10^{-6} \leq CR$<br>$< 10^{-5}$<br>$10^{-5} \leq CR$<br>$< 10^{-4}$<br>$10^{-4} \leq CR$<br>$< 10^{-3}$<br>$CR > 10^{-3}$ | Very low<br>Low<br>Medium<br>High<br>Very high                                                 | USEPA, 2011 b & c<br>Li et al. (2015)   |
| Cancer risks (CR)                   | $CR = CDI \times SF_0$<br>$CR = DAD \times (SF_0/GIABS)$<br>$CR = IUR \times EC$                |                                                                                                                                              |                                                                                                |                                         |

Abbreviation: C: metal concentration in sediment or soil (µg/g), IR: ingestion rate per unit time (mg/day), ED: exposure duration (years), EF: exposure frequency (days/year), BW: humans body weight (Kg), AT: averaging time (days), SA: surface area of contact (cm²), SL: skin adherence factor (mg/cm² h), ABS: absorption factor (unitless), C<sub>finh</sub>: conversion factor (10<sup>-6</sup> Kg/mg) (National Ambient Air Quality Standards, 2014)., AT<sub>n</sub>: average time (hours), Cf(inh): conversion factor of 3.5 \*10<sup>-4</sup>, RFD<sub>0</sub>: oral reference dose (mg kg<sup>-1</sup> day<sup>-1</sup>), RfC<sub>i</sub>: inhalation reference concentration (mg m<sup>-3</sup>), SF<sub>0</sub>: oral slope factor, IUR: inhalation unit risk ((µg m<sup>-3</sup>)<sup>-1</sup>), The values of RFD<sub>0</sub>, RfC<sub>i</sub>, SF<sub>0</sub>, GIABS and IUR were obtained from the USEPA (2011 b, c).

36

**Table S5.** Input parameters to characterize the HI values.

| Parameter | Description                         | Value                   |       | Unit                   |
|-----------|-------------------------------------|-------------------------|-------|------------------------|
|           |                                     | Adult                   | Child |                        |
| C         | Contamination concentration         |                         |       |                        |
| IR        | Ingestion rate per unit time (soil) | 100                     | 200   | mg day <sup>-1</sup>   |
| EF        | Exposure frequency                  | 180                     | 180   | Day year <sup>-1</sup> |
| ED        | Exposure duration                   | 30                      | 6     | years                  |
| BW        | Body weight                         | 70                      | 15    | Kg                     |
| AT        | Average time-non cancer risk        | ED*365                  |       | Days                   |
|           | Average time- cancer risk           | 70*365                  |       |                        |
| SL        | Skin adherence factor               | 0.2                     | 0.2   | mg/cm <sup>2</sup> h   |
| SA        | Exposure skin area                  | 3300                    | 2800  | cm <sup>2</sup>        |
| ABS       | Dermal absorption factor            | 0.001 for Cd            |       | Unitless               |
|           |                                     | 0.01 for other elements |       |                        |
| ATn       | Average time-non cancer risk        | ED*365*24               |       | Hours                  |
|           | Average time- cancer risk           | 70*365*24               |       |                        |

37

38

39

**Table S6.** Toxicity parameters used to investigate non-cancer and carcinogenic risks according to USEPA (2011a, b & c) and Ferreira-Baptista and De Miguel (2005).

| Metals | SF <sub>0</sub><br>mg kg <sup>-1</sup> day <sup>-1</sup> | IUR<br>(µg m <sup>3</sup> ) <sup>-1</sup> | RFD <sub>0</sub><br>mg kg <sup>-1</sup> day <sup>-1</sup> | RFC <sub>i</sub><br>mg m <sup>-3</sup> | GIABS | ABS   |
|--------|----------------------------------------------------------|-------------------------------------------|-----------------------------------------------------------|----------------------------------------|-------|-------|
| Cd     | 0.28                                                     | 1.8E-03                                   | 1.0E-03                                                   | 1.0E-05                                | 0.025 | 0.001 |
| Co     |                                                          | -                                         | 3.0E-04                                                   | 6.0E-06                                | 1     | 0.01  |
| Cr     |                                                          | 9.0E-03                                   | 3.0E-03                                                   | 2.9E-05                                | 0.013 | 0.01  |
| Pb     |                                                          | 8.0E-05                                   | 3.5E-03                                                   | -                                      | 1     | 0.1   |
| Ni     |                                                          | 2.4E-04                                   | 1.1E-02                                                   | 1.4E-05                                | 0.04  | 0.01  |
| Cu     |                                                          | -                                         | 4.0E-02                                                   | -                                      | 1     | 0.01  |
| Mn     |                                                          | -                                         | 1.4E-01                                                   | 5.0E-05                                | 1     | 0.01  |
| Zn     |                                                          | -                                         | 3.0E-01                                                   | -                                      | 1     | 0.01  |
